# Supplementary material for: An ultra pH-responsive peptide nanocarrier for cancer gene therapy
Source: Royal Society of Chemistry journal article supplement (doi:10.1039/d3tb01311a), 2023-01-01
Supplement: d3tb01311a1.pdf [file d3tb01311a1.pdf]

## Supporting information

### **An ultra pH-responsive peptide nanocarrier for cancer gene therapy**

Zixuan Wang<sup>a,‡</sup>, Xuelin Zhang<sup>a,‡</sup>, Mingshan Han<sup>a</sup>, Xinhao Jiao<sup>a</sup>, Jialin Zhou<sup>a</sup>, Xinyao Wang<sup>a</sup>,  
Rongxin Su<sup>a,b,c</sup>, Yuefei Wang<sup>a,c,d,\*</sup>, Wei Qi<sup>a,b,c,\*</sup>

<sup>a</sup> School of Chemical Engineering and Technology, State Key Laboratory of Chemical Engineering,  
Tianjin University, Tianjin 300072, P. R. China

<sup>b</sup> Collaborative Innovation Center of Chemical Science and Engineering (Tianjin), Tianjin 300072,  
P. R. China

<sup>c</sup> Tianjin Key Laboratory of Membrane Science and Desalination Technology, Tianjin University,  
Tianjin 300072, P. R. China.

<sup>d</sup> Beyonpep Biotechnology Limited, Tianjin 300110, P. R. China.

‡ These authors contributed equally to this work.

\* Corresponding author: Yuefei Wang (email: wangyuefei@tju.edu.cn) and Wei Qi (email:  
qiwei@tju.edu.cn).

**S-I Supporting data**

**S-II Peptide sequences**

## S-I Supporting data

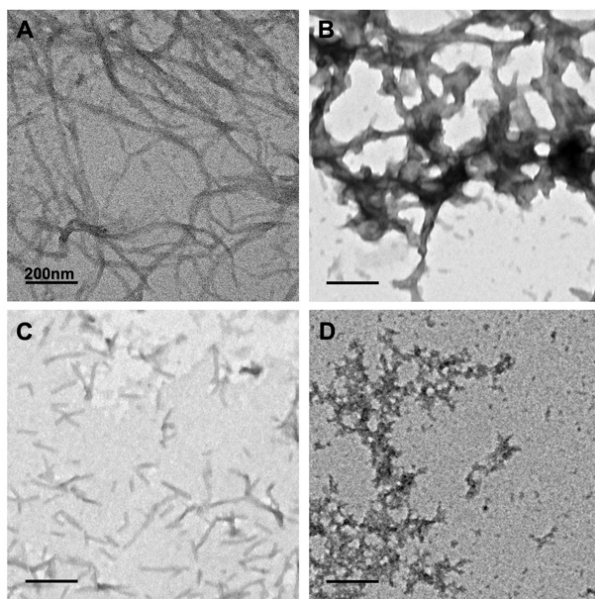

Figure S1. TEM iamges of KD-n at pH 7.4. (A) KD-1; (B) KD-2; (C) KD-3; (D) KD-4.

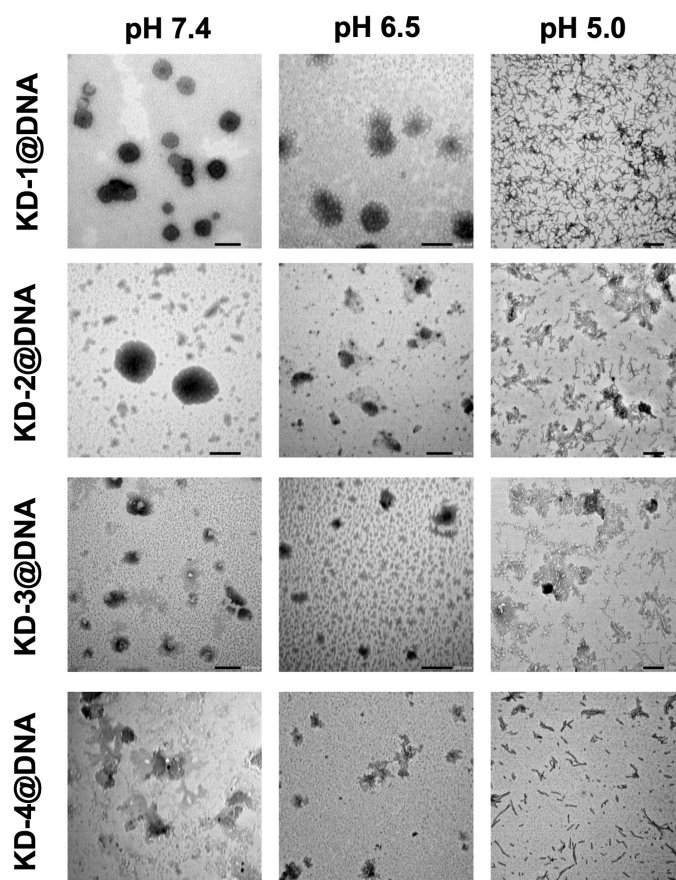

Figure S2. TEM images of KD-n@DNA incubated in pH 7.4, pH 6.5, and pH 5.0 buffer solutions for 4 h.

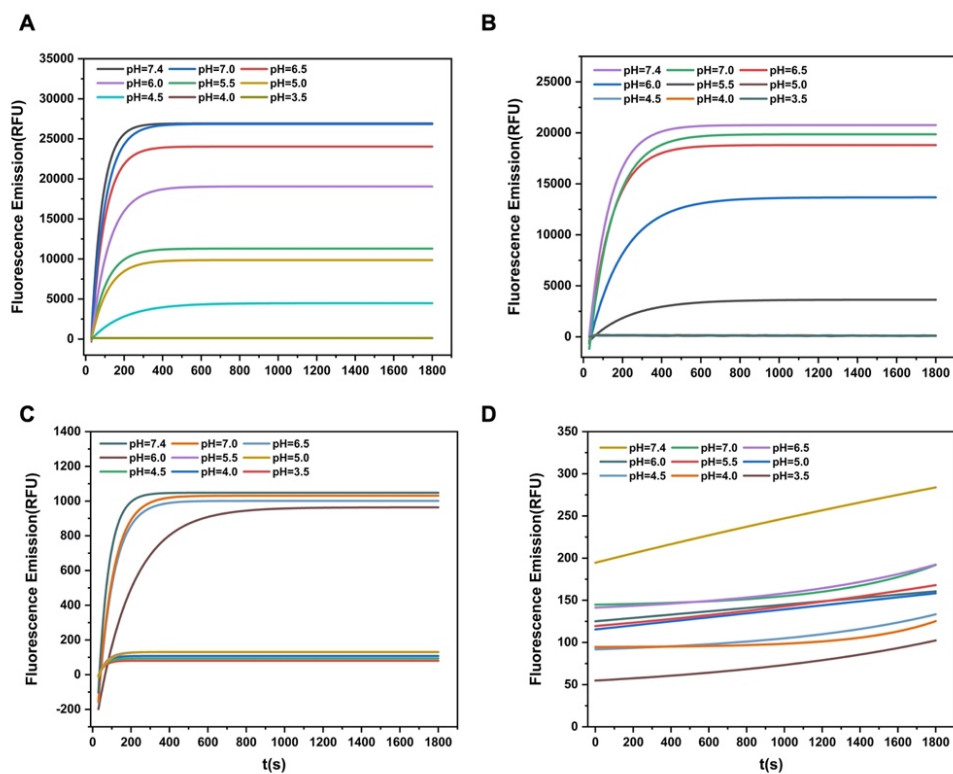

**Figure S3. The fluorescence intensity curve of ANS as a fluorescent probe assembled with KD-n at different pH. (A) KD-1; (B) KD-2; (C) KD-3; (D) KD-4.**

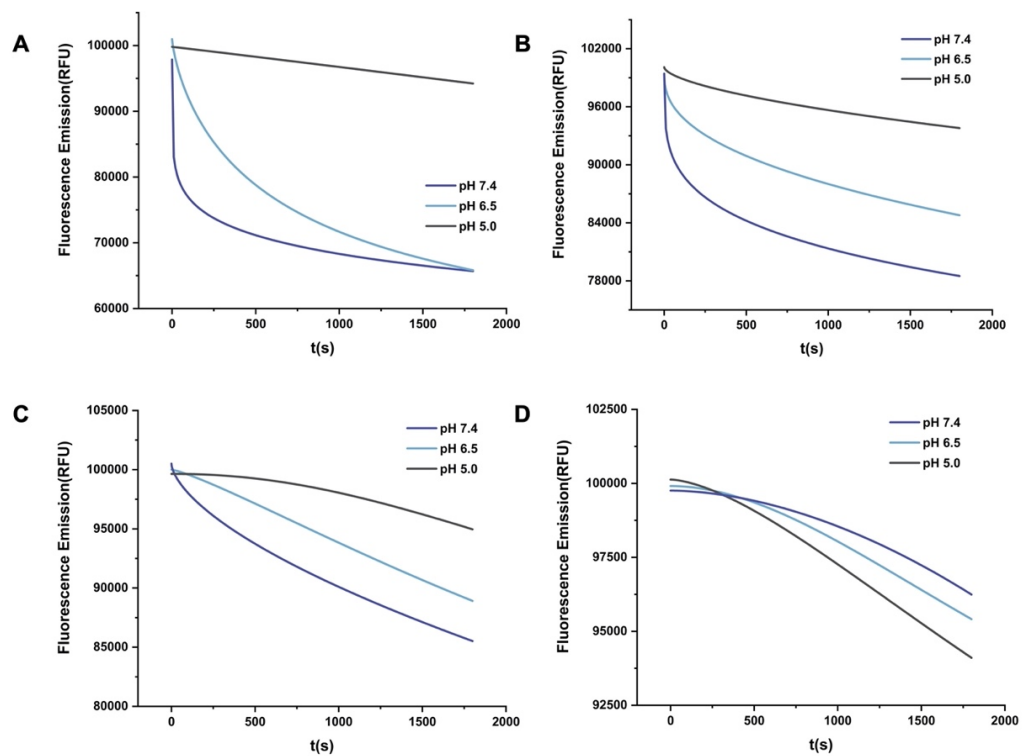

**Figure S4. Kinetic measurements. (A) KD-1; (B) KD-2; (C) KD-3; (D) KD-4**

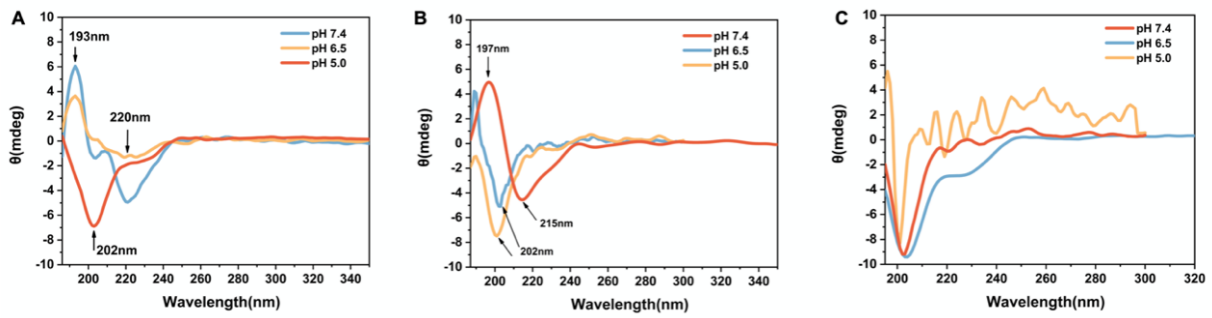

**Figure S5. Circular Dichroism Spectroscopy of KD-n@DNA at pH 7.4, pH 6.5 and pH 5.0. (A)KD-2; (B)KD-3; (C)KD-4**

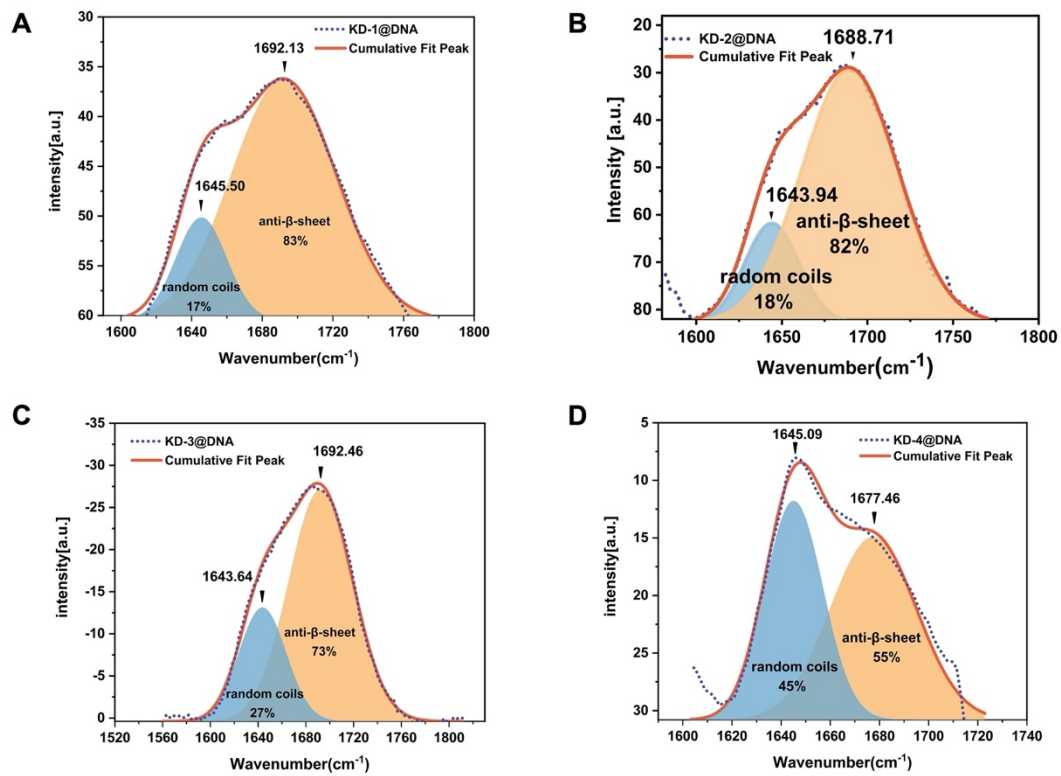

**Figure S6. Fourier Transform Infrared Spectroscopy of KD-n at pH 7.4, pH 6.5 and pH 5.0. (A) KD-1; (B) KD-2; (C) KD-3; (D) KD-4**

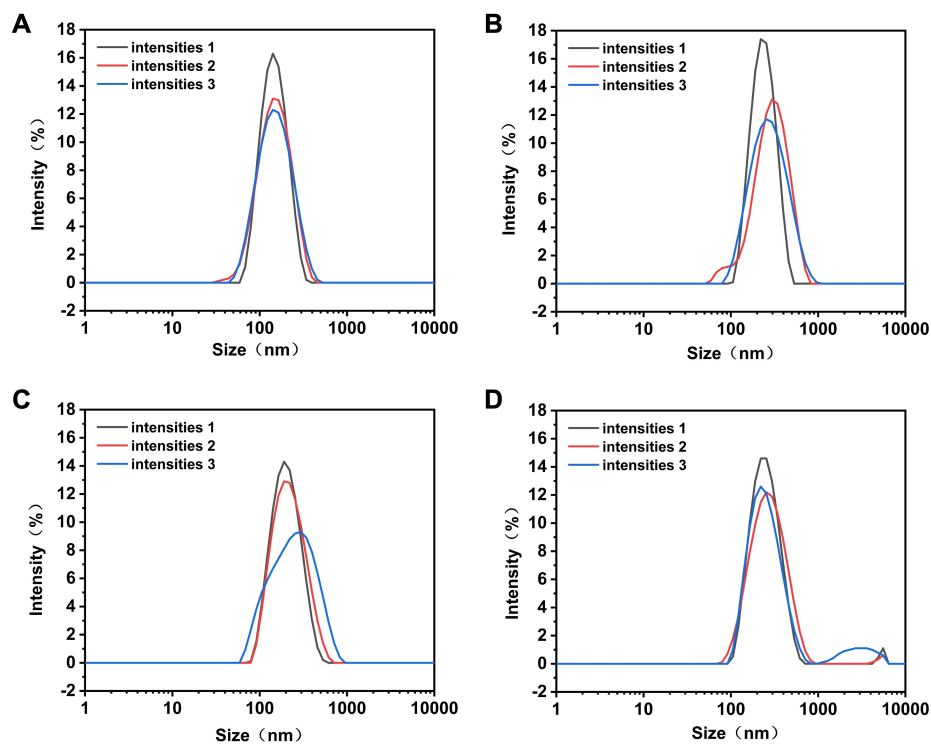

**Figure S7.** Particle size distribution plot of KD-n@DNA at pH 7.4. (A) KD-1; (B) KD-2; (C) KD-3; (D) KD-4

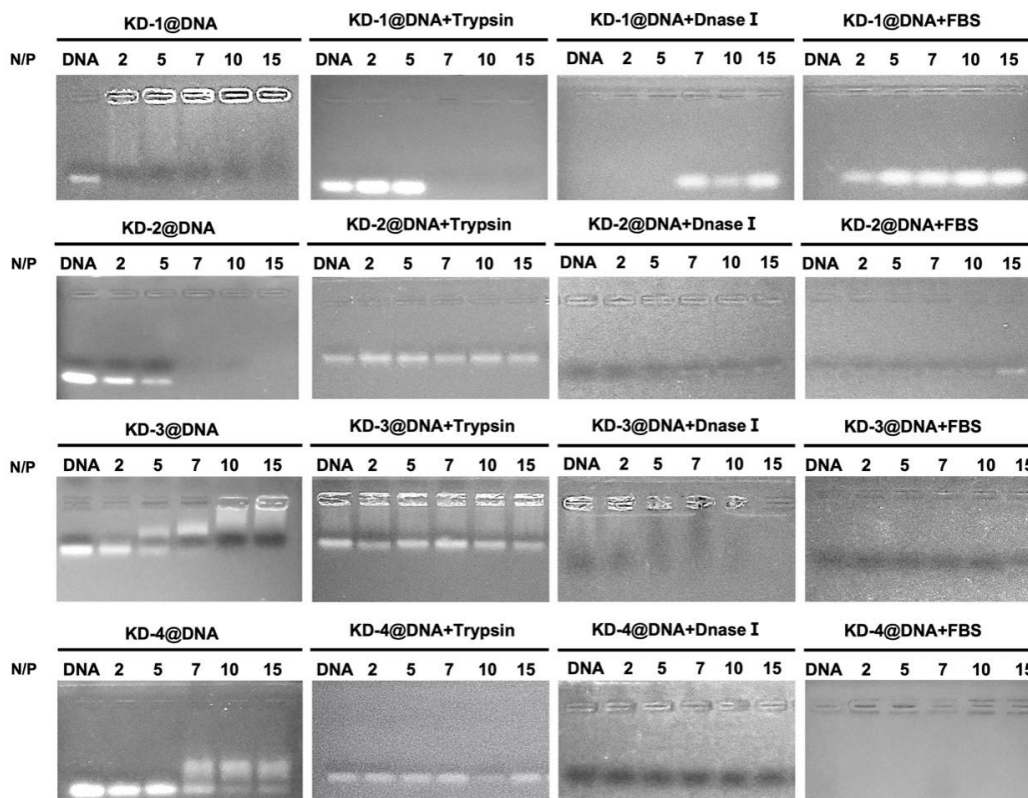

**Figure S8.** EMSAs of KD-n@DNA treated with Trypsin, Dnase I, and fetal bovine serum (FBS).



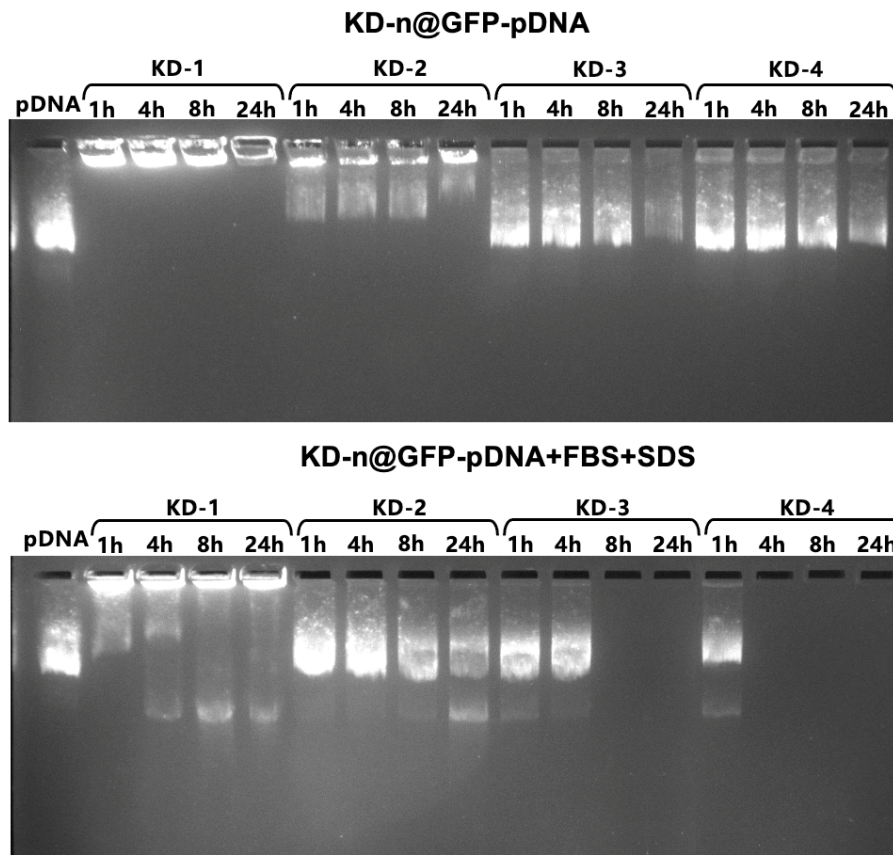

Figure S9. Serum stability of KD-n@GFP-pDNA nanoparticles for 24 h at 37°C.

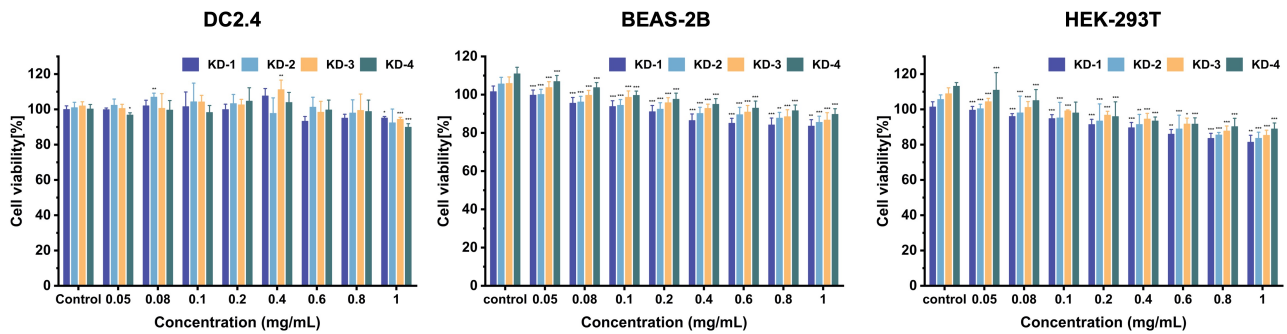

Figure S10. In vitro cytotoxicity of KD-n and control against DC2.4 cells, BEAS-2B cells and HEK-293T cells after 48 h of incubation. \*\*,  $p < 0.01$ ; \*\*\*,  $p < 0.001$ .

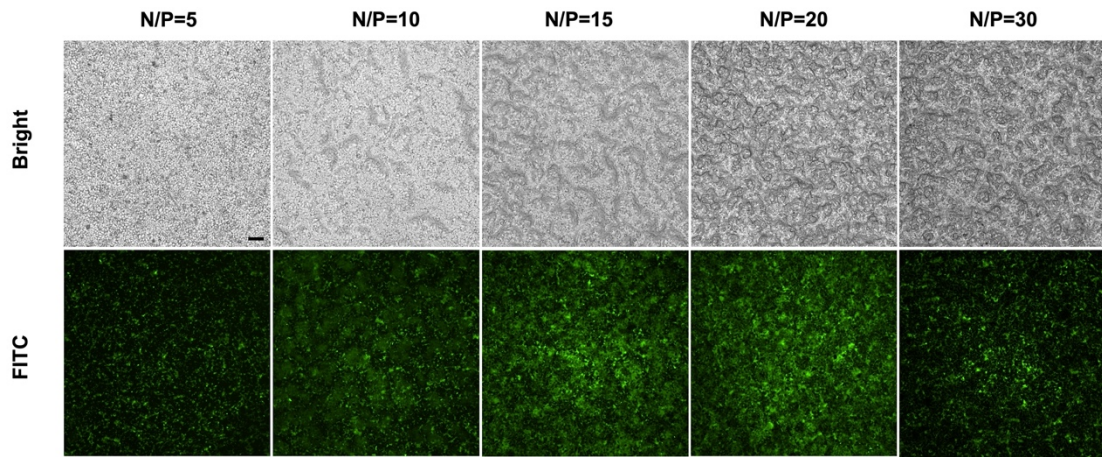

**Figure S11. Fluorescent microscopy analysis of HeLa cells treated with KD-1@FAM-siRNA for 4 h. Scale bar:400  $\mu$ m.**

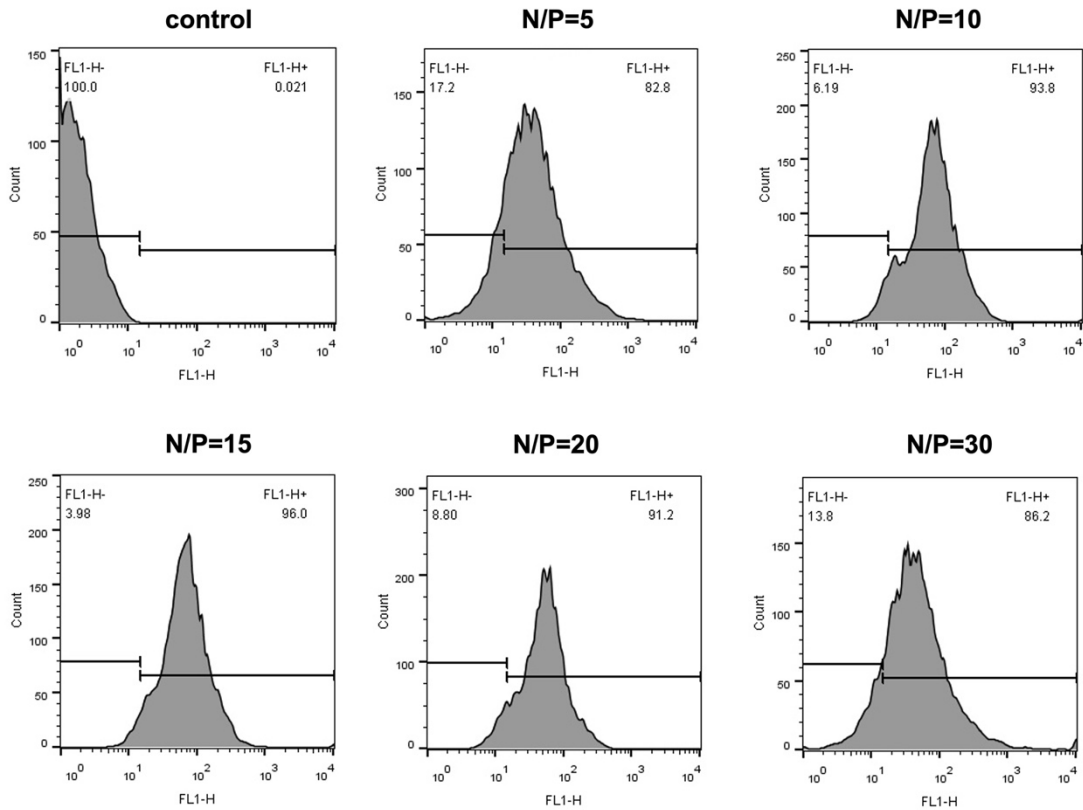

**Figure S12. Flow cytometric analyses of HeLa cells treated with KD-1@FAM-siRNA for 4 h.**



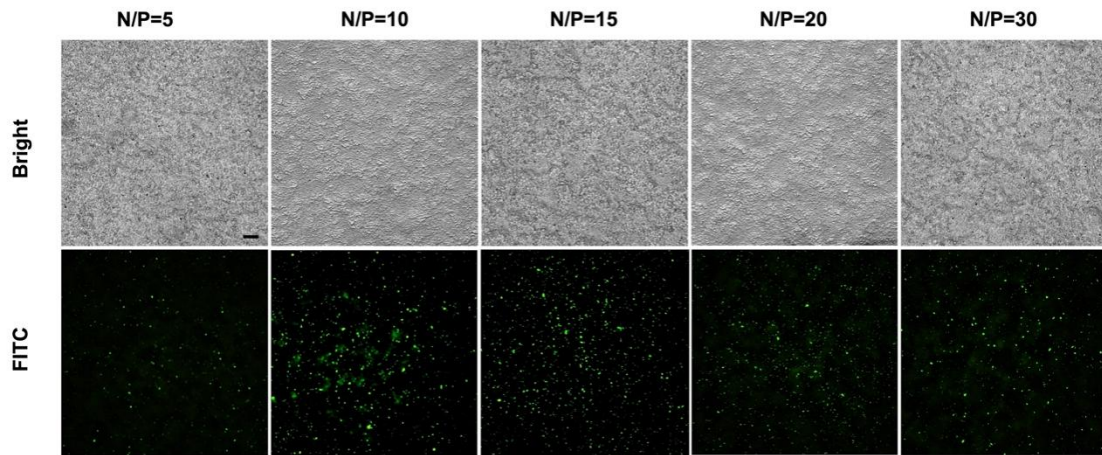

**Figure S13. Fluorescent microscopy analysis of HeLa cells treated with KD-2@FAM-siRNA for 4 h. Scale bar:400  $\mu$ m.**

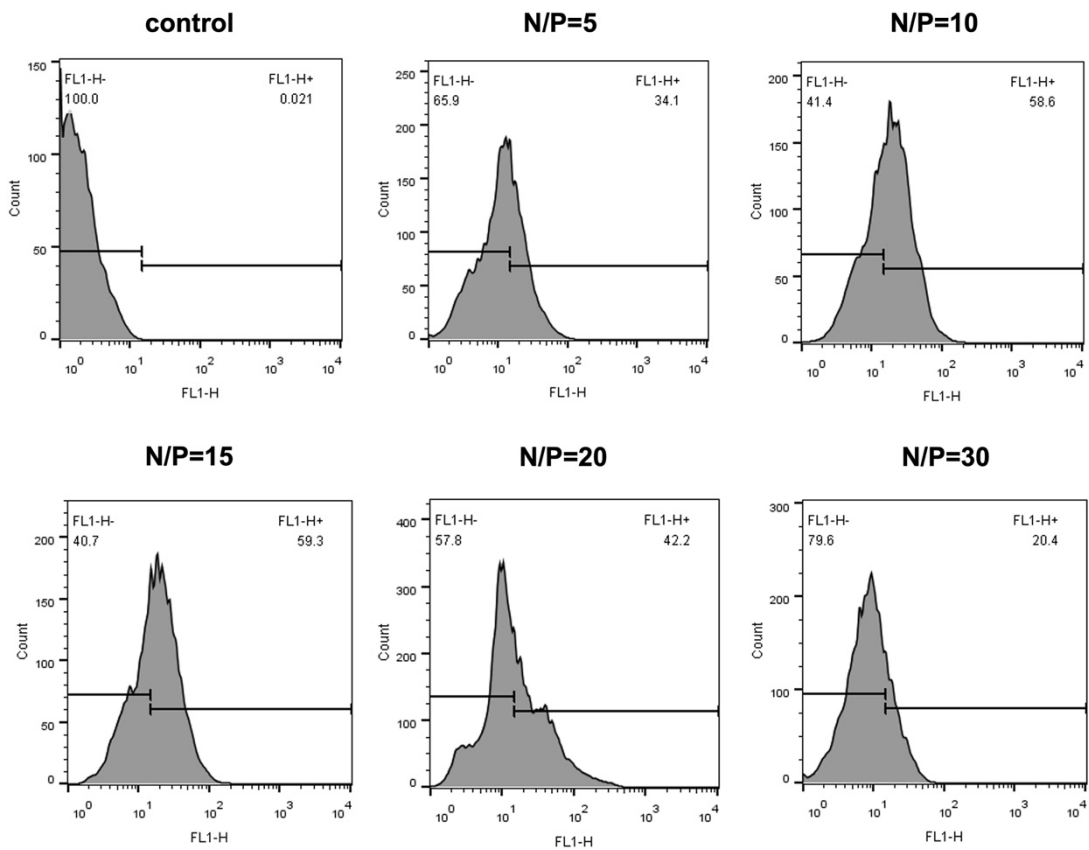

**Figure S14. Flow cytometric analyses of HeLa cells treated with KD-2@FAM-siRNA for 4 h.**

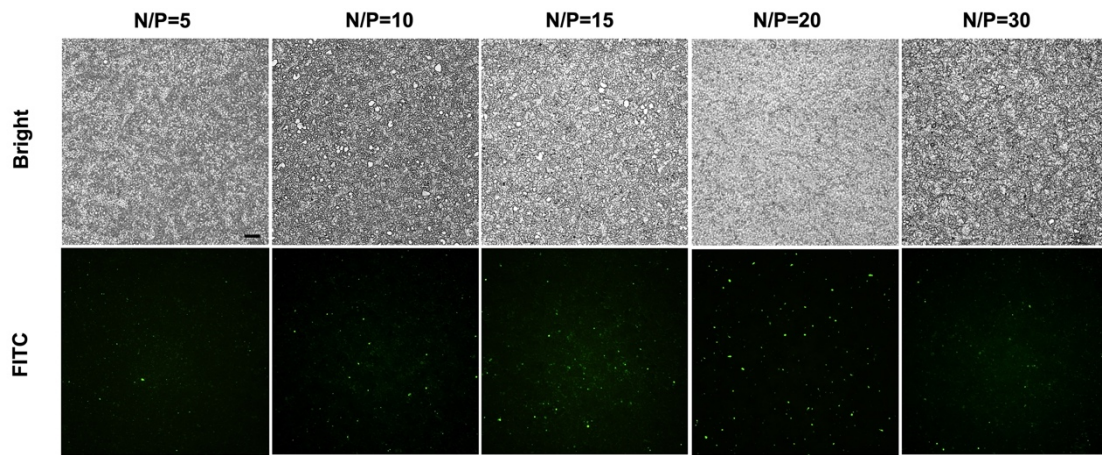

**Figure S15. Fluorescent microscopy analysis of HeLa cells treated with KD-3@FAM-siRNA for 4 h. Scale bar:400  $\mu$ m.**

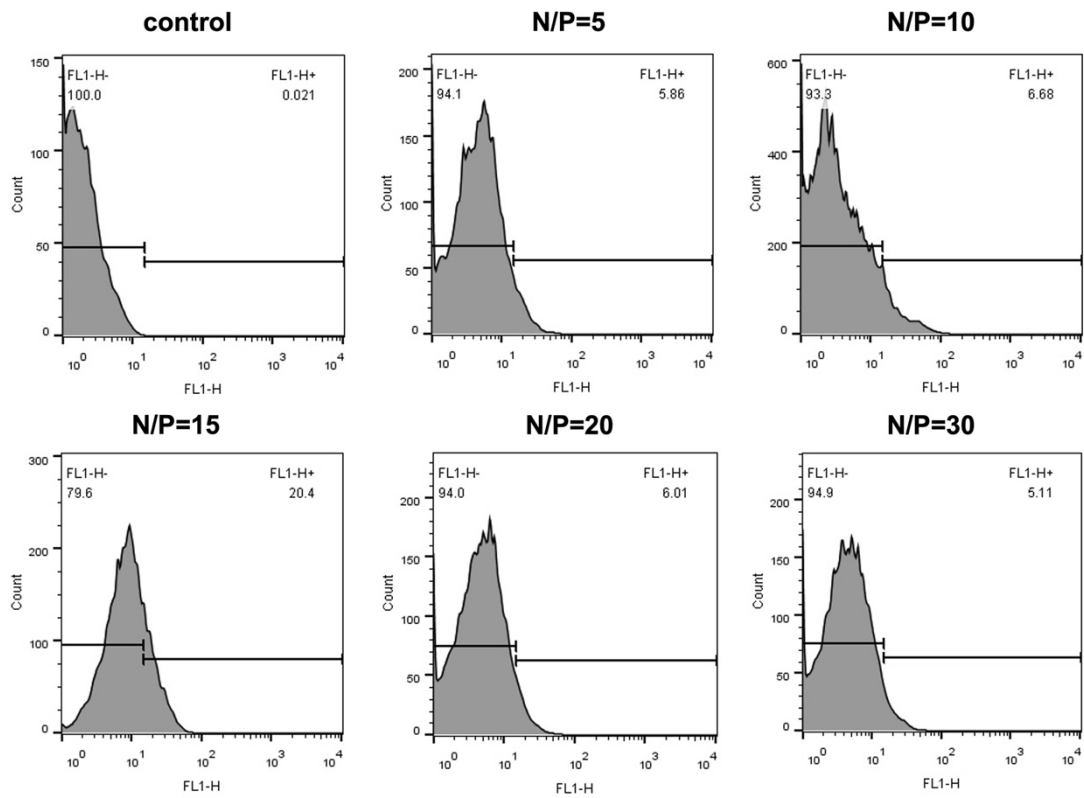

**Figure S16. Flow cytometric analyses of HeLa cells treated with KD-3@FAM-siRNA for 4 h.**

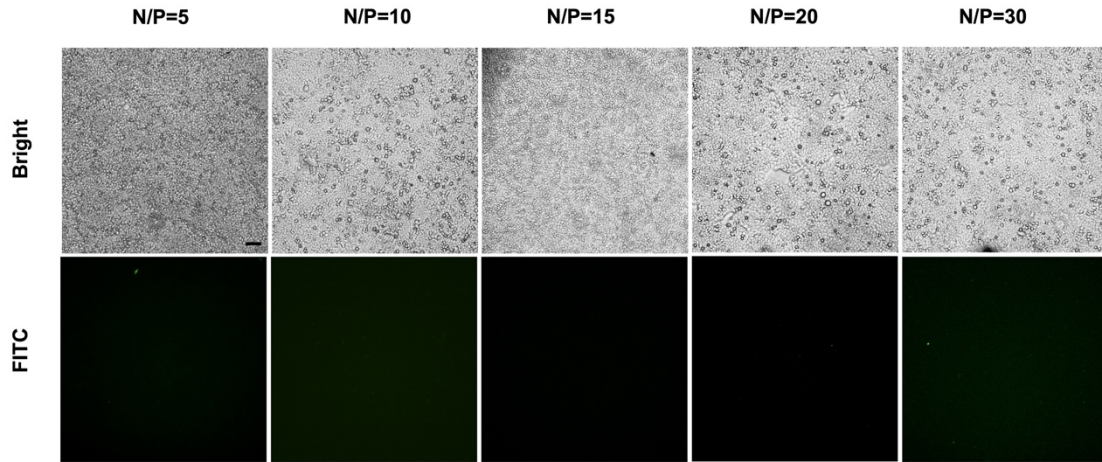

**Figure S17. Fluorescent microscopy analysis of HeLa cells treated with KD-4@FAM-siRNA for 4 h. Scale bar:400  $\mu$ m.**

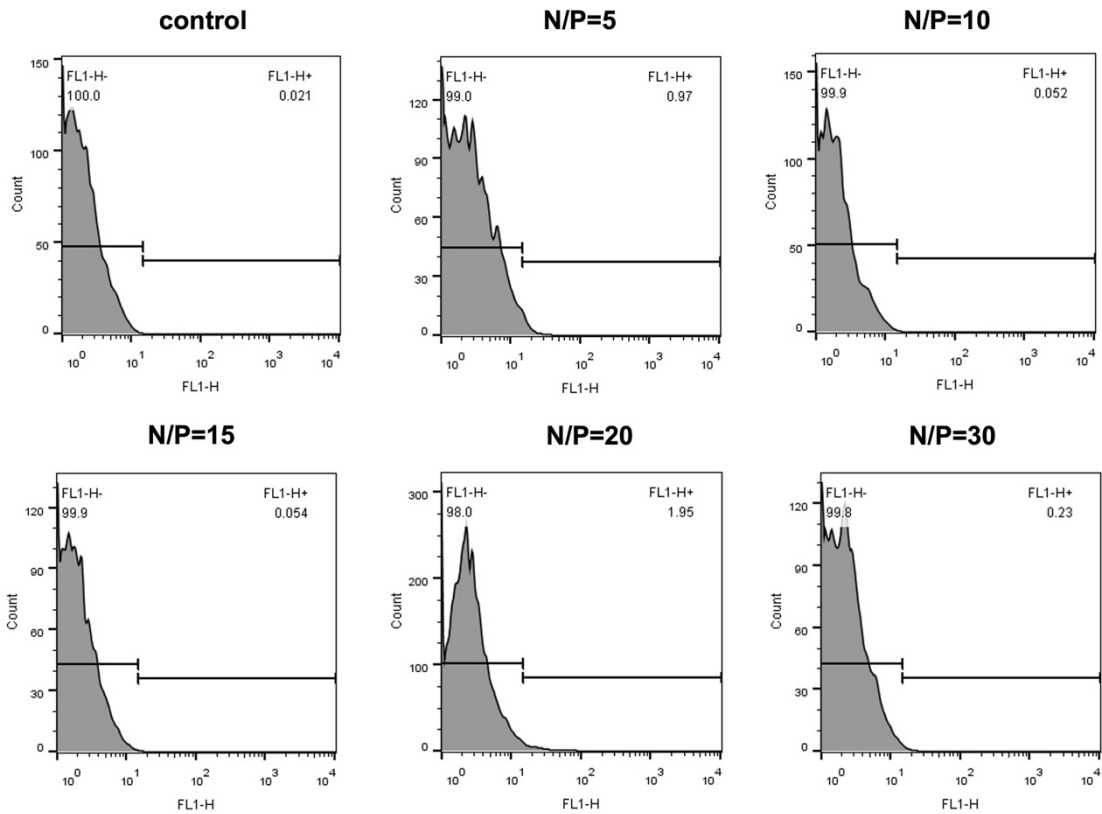

**Figure S18. Flow cytometric analyses of HeLa cells treated with KD-4@FAM-siRNA for 4 h.**

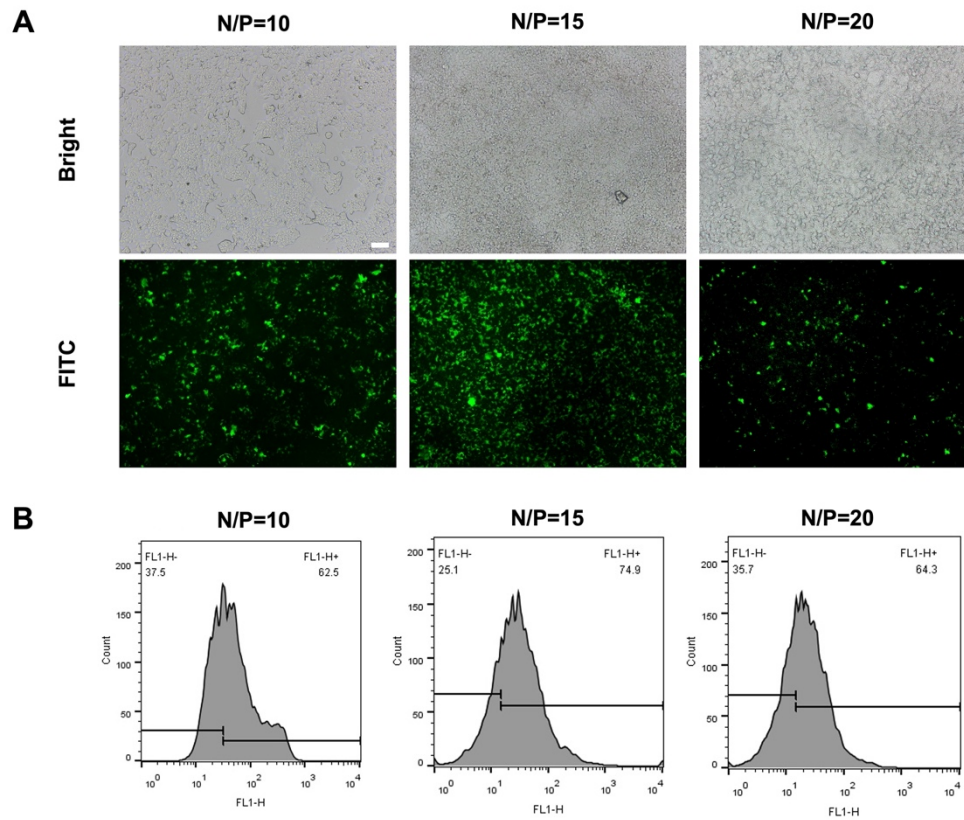

**Figure S19. (A) Fluorescent microscopy analysis and (B) flow cytometric analysis of HeLa cells treated with KD-1@GFP-mRNA for 48 h. Scale bar: 200  $\mu$ m.**



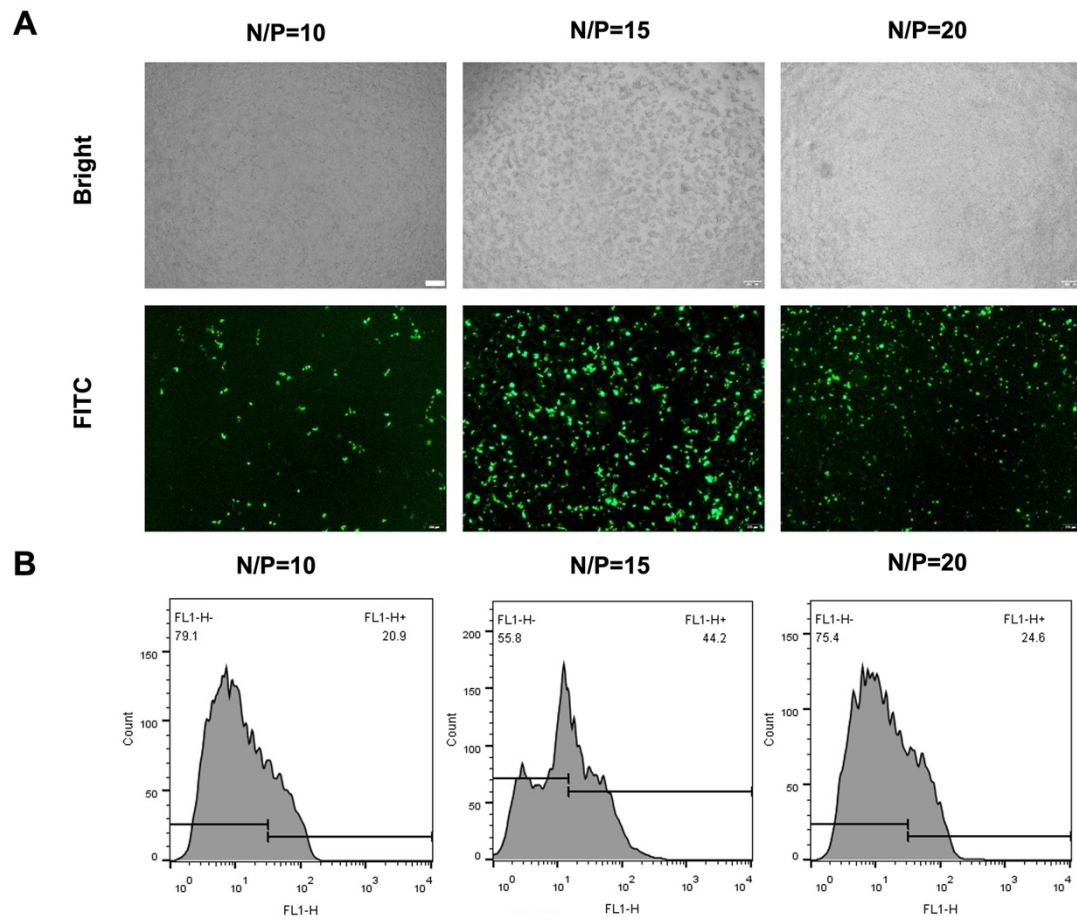

**Figure S20. (A) Fluorescent microscopy analysis and (B) flow cytometric analysis of HeLa cells treated with KD-2@GFP-mRNA for 48 h. Scale bar: 200  $\mu$ m.**

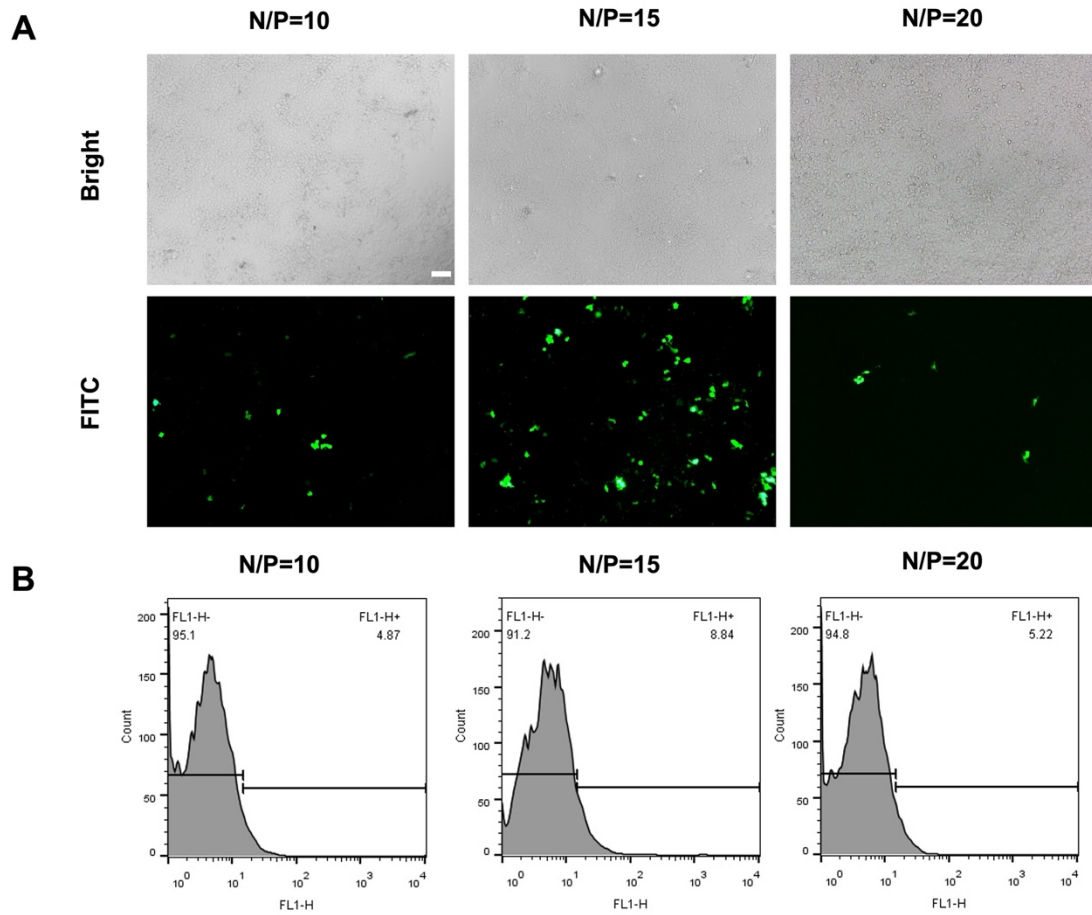

**Figure S21. (A) Fluorescent microscopy analysis and (B) flow cytometric analysis of HeLa cells treated with KD-3@GFP-mRNA for 48 h. Scale bar: 200  $\mu$ m.**

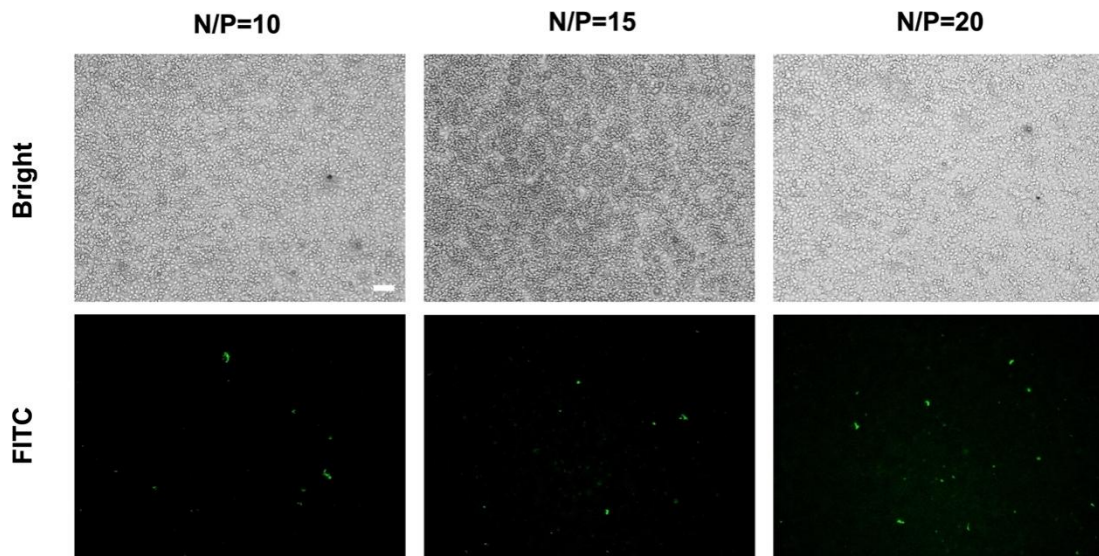

**Figure S22. Fluorescent microscopy analysis of HeLa cells treated with KD-4@GFP-mRNA for 48 h. Scale bar: 200  $\mu$ m.**



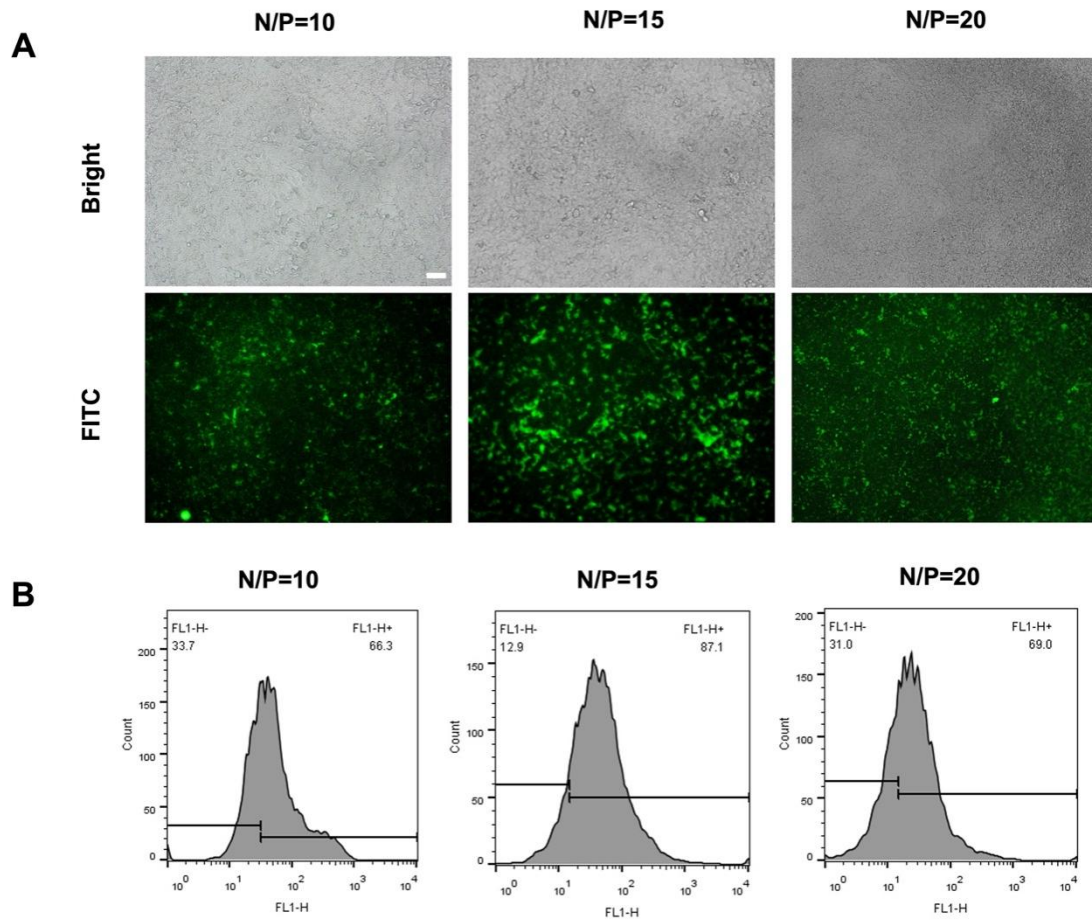

**Figure S23. (A) Fluorescent microscopy analysis and (B) flow cytometric analysis of HeLa cells treated with KD-1@GFP-pDNA for 48 h. Scale bar: 200  $\mu$ m.**

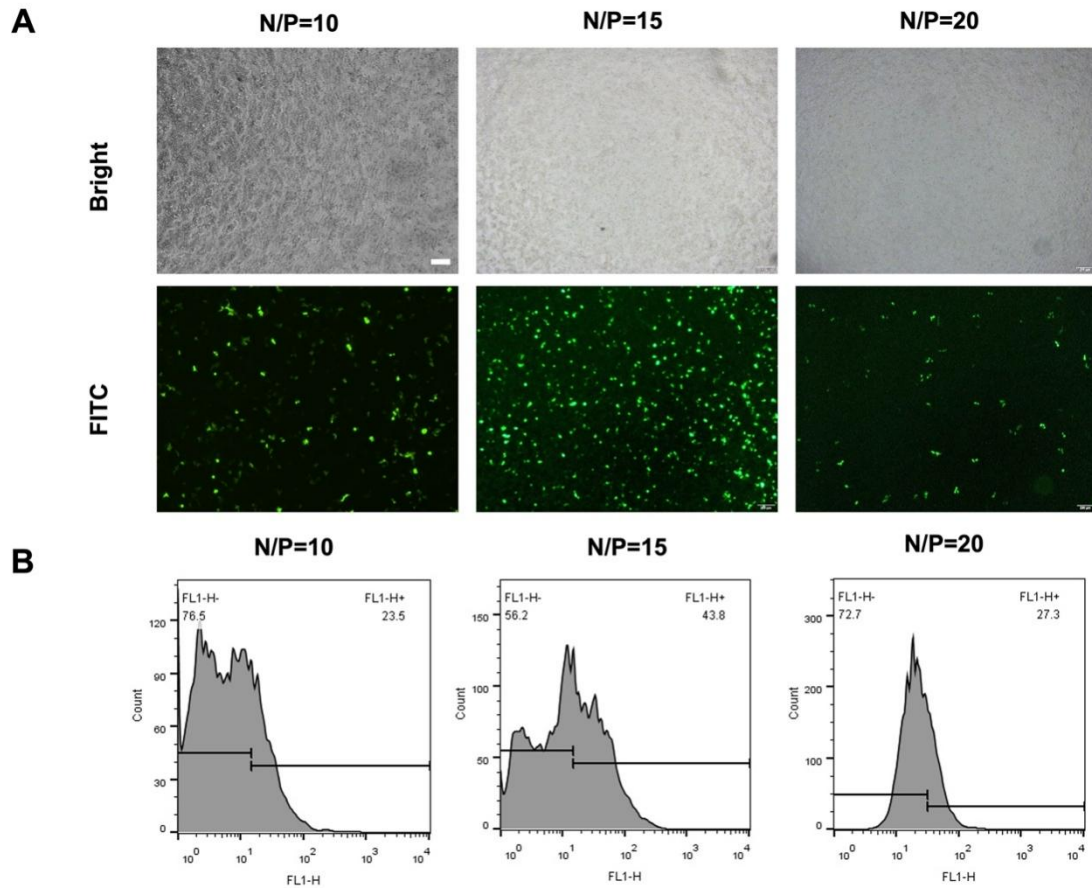

**Figure S24. (A) Fluorescent microscopy analysis and (B) flow cytometric analysis of HeLa cells treated with KD-2@GFP-pDNA for 48 h. Scale bar: 200  $\mu$ m.**

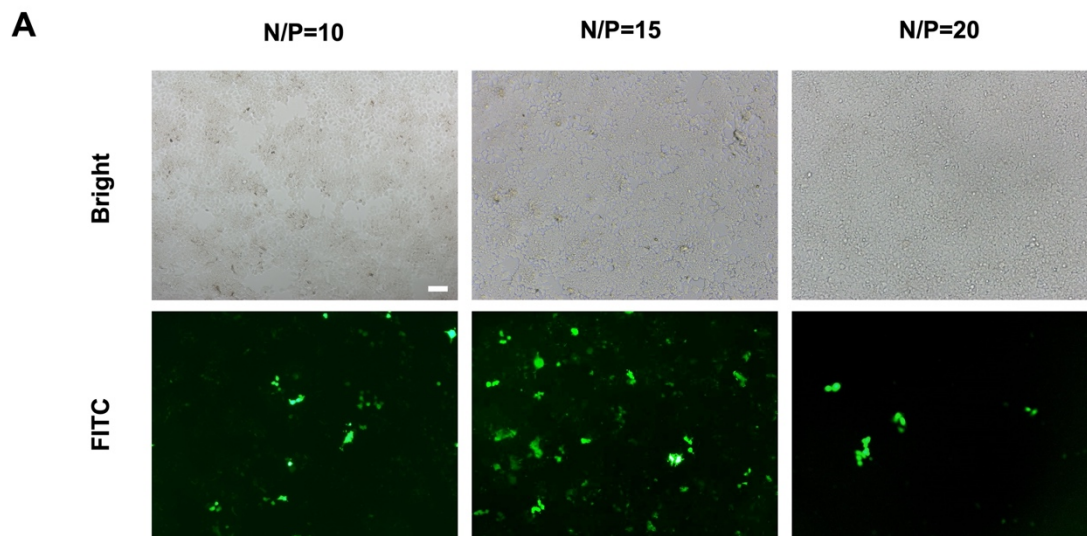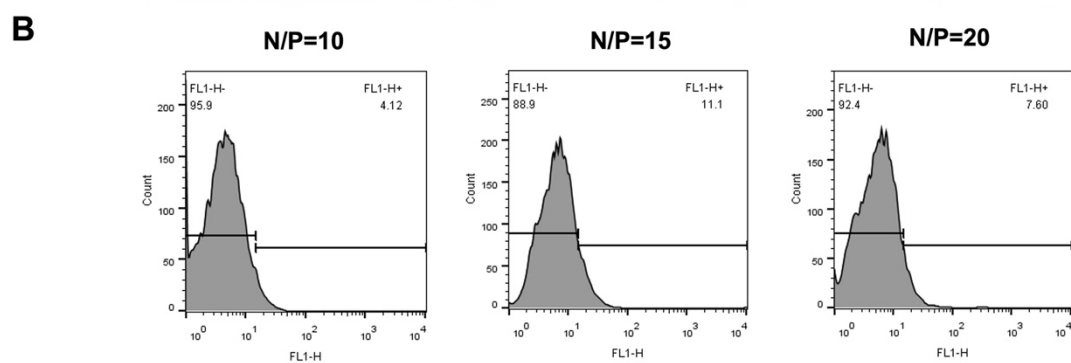

**Figure S25. (A) Fluorescent microscopy analysis and (B) flow cytometric analysis of HeLa cells treated with KD-3@GFP-pDNA for 48 h. Scale bar: 200  $\mu$ m.**

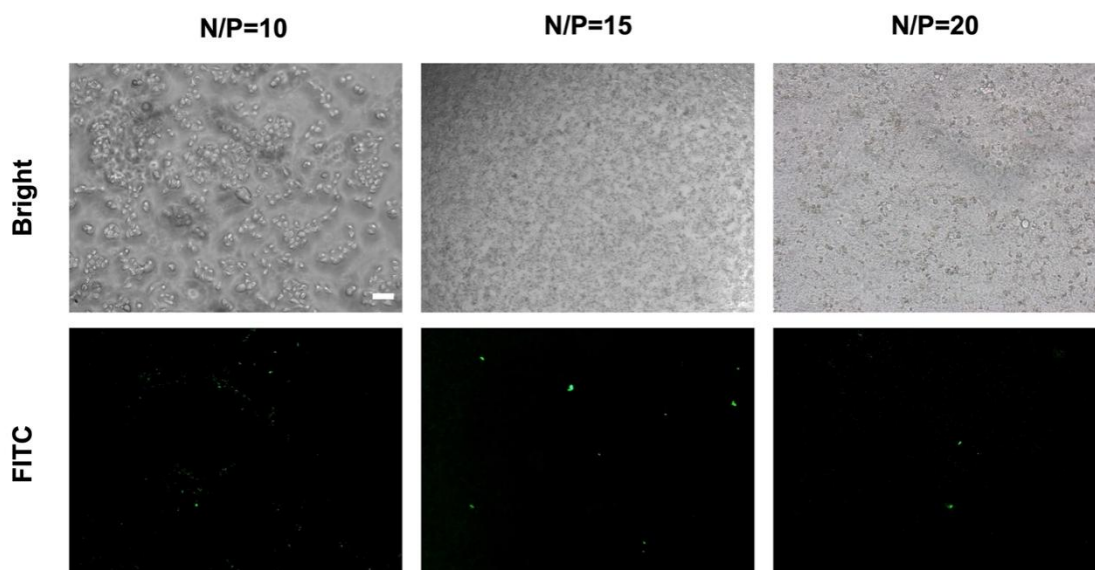

**Figure S26. Fluorescent microscopy analysis of HeLa cells treated with KD-4@GFP-pDNA for 48 h. Scale bar: 200  $\mu$ m.**

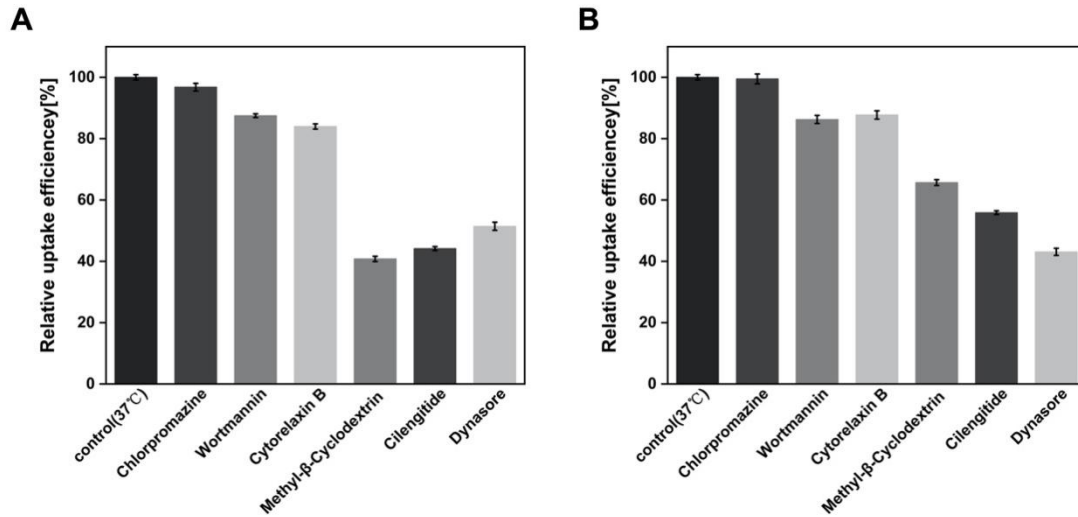

**Figure S27. Uptake efficiency of HeLa cells treated with FITC-labeled KD-n@siRNA in the presence of inhibitors. (A) KD-2; (B) KD-3**

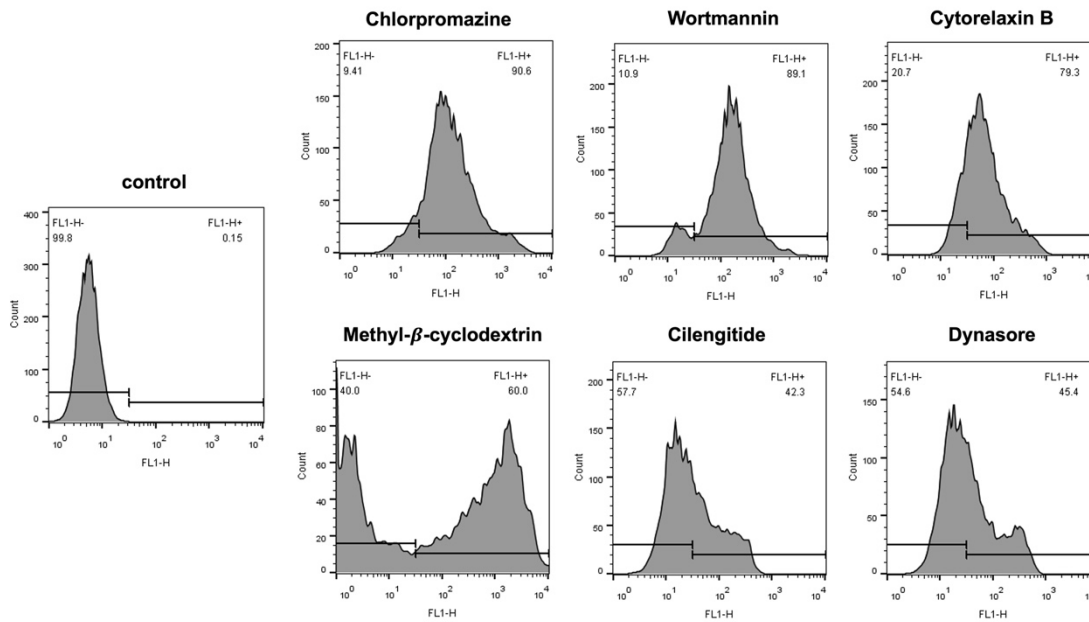

**Figure S28. Flow cytometric analysis of HeLa cells treated with FITC-labeled KD-1@siRNA in the presence of inhibitors.**

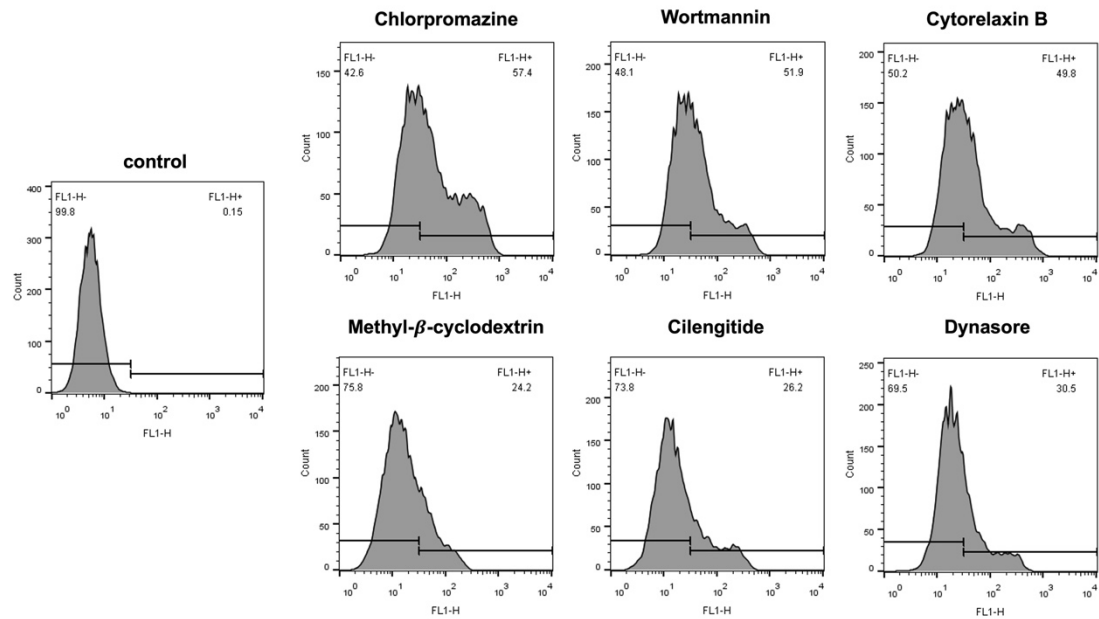

**Figure S29. Flow cytometric analysis of HeLa cells treated with FITC-labeled KD-2@siRNA in the presence of inhibitors.**

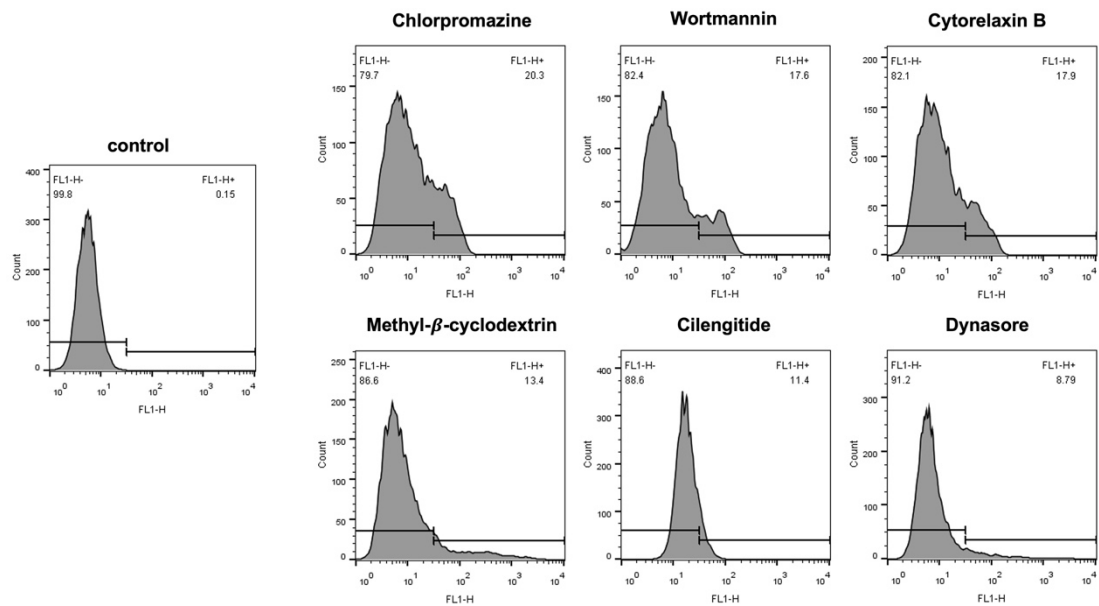

**Figure S30. Flow cytometric analysis of HeLa cells treated with FITC-labeled KD-3@siRNA in the presence of inhibitors.**

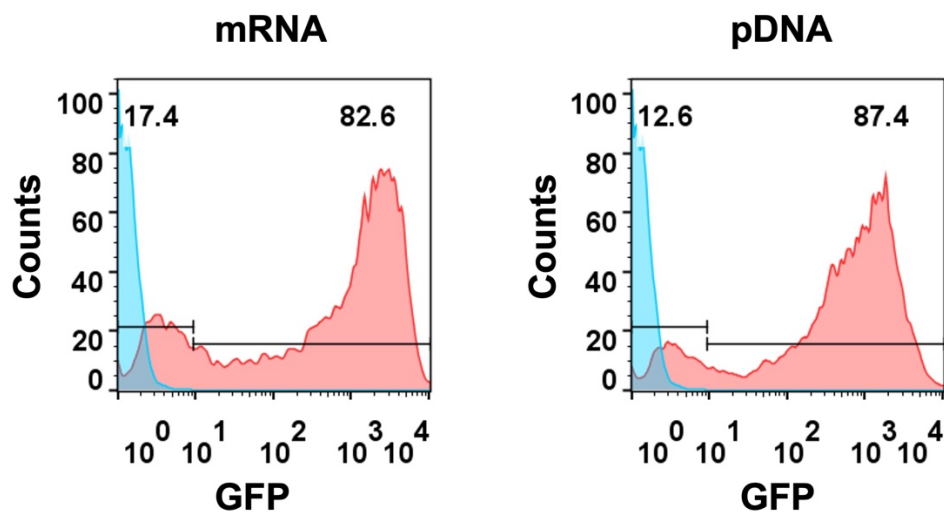

Figure S31. Flow cytometric analysis of Hela cells treated with *Lipofectamine 2000* for 48 h.

## S-II peptide sequences

**Table S1** Peptides reported in this study

| Name | Sequence                    | Molecular weight (Da) | pH <sub>0</sub> |
|------|-----------------------------|-----------------------|-----------------|
| KD-1 | KKKHHHH-Acp-LLLLLLLLGSPDRGD | 2654.16               | 5.5             |
| KD-2 | KKK-Acp-LLHLLHLLHGSPDRGD    | 2290.71               | 5.8             |
| KD-3 | KKKHHHH-Acp-LLLLGSPDRGD     | 2201.53               | 6.0             |
| KD-4 | KKKHHHH-Acp-GSPDRGD         | 1748.90               | none            |

Acp stands for 6-Aminocaproic acid. The amino acids in the peptide are L-type amino acids.
